# Supplementary material for: Online molecular characterisation of organic aerosols in an atmospheric chamber using extractive electrospray ionisation mass spectrometry
Source: Copernicus journal article supplement (doi:10.5194/acp-17-14485-2017), 2017-12-06
Supplement: Supplementary file 1 [file acp-17-14485-2017-supplement.pdf]

Supplement of Atmos. Chem. Phys., 17, 14485–14500, 2017  
<https://doi.org/10.5194/acp-17-14485-2017-supplement>  
© Author(s) 2017. This work is distributed under  
the Creative Commons Attribution 4.0 License.

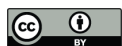

*Supplement of*

## **Online molecular characterisation of organic aerosols in an atmospheric chamber using extractive electrospray ionisation mass spectrometry**

**Peter J. Gallimore et al.**

*Correspondence to:* Peter J. Gallimore ([pjg48@cam.ac.uk](mailto:pjg48@cam.ac.uk)) and Markus Kalberer ([markus.kalberer@atm.ch.cam.ac.uk](mailto:markus.kalberer@atm.ch.cam.ac.uk))

The copyright of individual parts of the supplement might differ from the CC BY 4.0 License.

## Experimental setup

The experimental setups used for production and classification of standard aerosols (section 2.1) and for the simulation chamber experiments (section 2.2) are shown below.

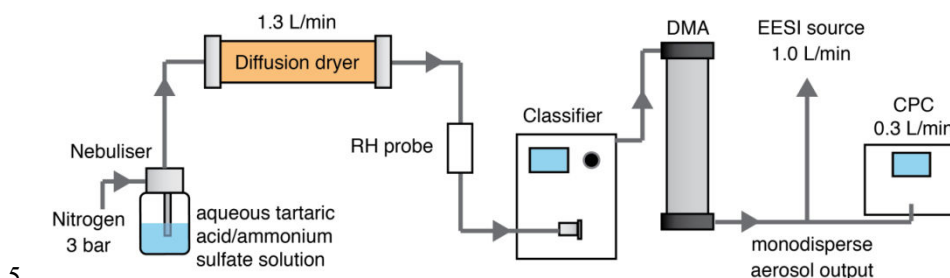

Figure S1: Aerosol flow setup used for producing, classifying and measuring the chemical composition of model aerosols to quantify the extraction process.

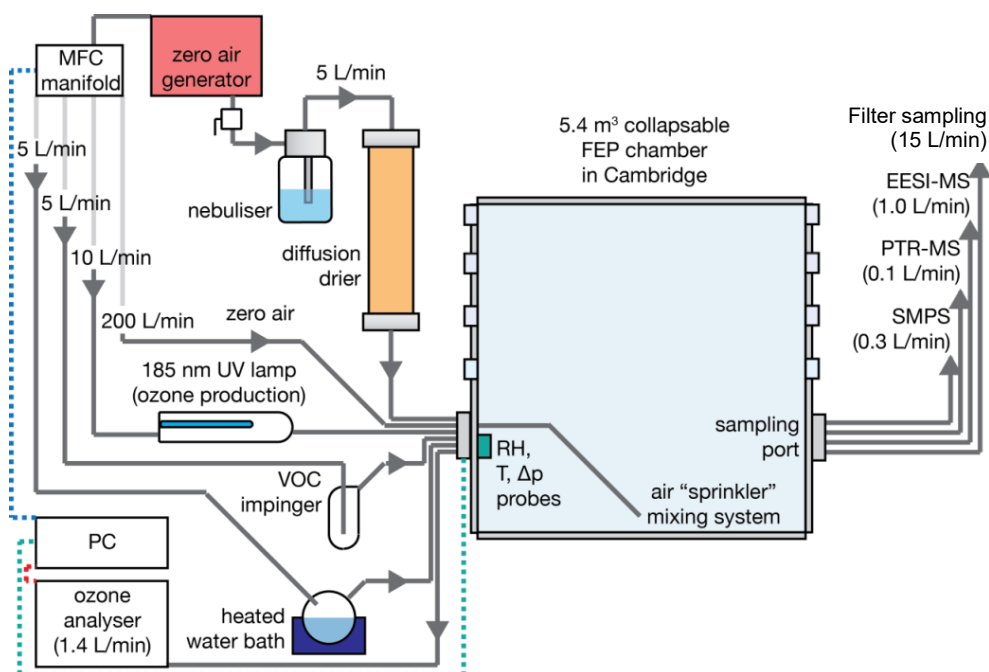

10 Figure S2: Operational details for the Cambridge Atmospheric Simulation Chamber (CASC), adapted  
from Gallimore et al., (2017b). The 5.4 m<sup>3</sup> chamber enables study of secondary organic aerosol formation  
and aging processes in the laboratory; water vapour, seed aerosols, atmospheric oxidants and volatile  
organic compounds can be introduced under controlled conditions. A variety of instruments are attached  
to characterise the resulting chemistry, including a recently-developed extractive electrospray ionisation  
15 mass spectrometer (EESI-MS) to detect organic aerosol components.

### Flow conditions in the EESI batch sampling system

This section considers the flow and mixing characteristics in the 10 L sampling reservoir (dimensions ~ 92 × 12 cm) described in section 2.3. The 1 L min<sup>-1</sup> “pushing flow” was introduced under laminar flow conditions (Reynolds number ~12). The total introduction of air was 3.5 L over 5 3.5 minutes, corresponding to a nominal distance of 32 cm along the flow tube. The extent of additional mixing beyond this volume displacement will be determined by molecular diffusion, described by Equation S1:

$$\tau = \frac{l^2}{D} \quad (\text{S1})$$

10 Where  $\tau$  is the diffusion time,  $l$  is the diffusion length and  $D$  is the diffusion coefficient of air. Diffusion of accumulation mode particles will be negligible by comparison. For an introduction time of 3.5 minutes and diffusion coefficient 0.2 cm<sup>2</sup> s<sup>-1</sup>, the diffusion length is 6.5 cm. Therefore only the first ~40 % of the tube length, furthest from the MS sampling, will be influenced by zero air introduction.

15

The EESI-MS signal is also relatively consistent across each 3.5 minute sampling period (Figure 3), confirming that this cycling does not significantly affect the sampled particle composition.

### Reaction scheme for MCM simulations

The reaction scheme for the degradation of  $\alpha$ -pinene is based on the mechanism described in Saunders et al. (2003). All reactions involving the ozone-initiated oxidation of  $\alpha$ -pinene and its products, including decomposition of reaction intermediates and secondary OH-mediated chemistry, were extracted from the MCM website (<http://mcm.leeds.ac.uk/MCM>) in June 2017. This mechanism extract comprises 313 explicit species.

We also included an auxiliary reaction to approximate the gradual introduction of ozone into the chamber (reaction S2):

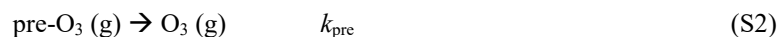

10

Pre-O<sub>3</sub> does not participate in any other reactions, and is converted into O<sub>3</sub> on a timescale  $\tau_{\text{pre}} = 1/k_{\text{pre}} = 3\text{-}30$  minutes, adjusted to reflect the experimental timescale for ozone introduction for each experiment.

15 The simulations were initialised with all species concentrations set to zero, apart from:  $\alpha$ -pinene (APINENE), which was set to 45, 100 and 500 ppb for the low, medium and high concentration experiments respectively, and pre-O<sub>3</sub> (PREO3) which was adjusted to simulate the observed  $[\text{O}_3]_{\text{max}}$  in each experiment (Table 1).

### Extraction efficiency of tartaric acid in mixed organic-inorganic aerosols

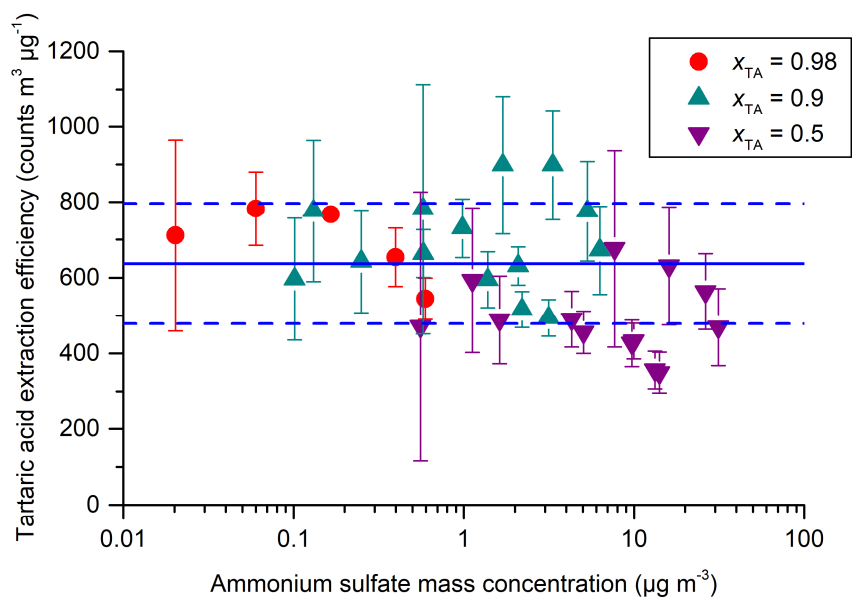

5 **Figure S3: Tartaric acid MS signal, normalised by the tartaric acid aerosol mass, as a function of the ammonium sulfate aerosol mass. The blue solid and dotted lines represent the mean and standard deviation respectively of measurements on single-component tartaric acid aerosols ( $x_{TA} = 1$ ).**

## Mass spectra for EESI-MS and PTR-MS

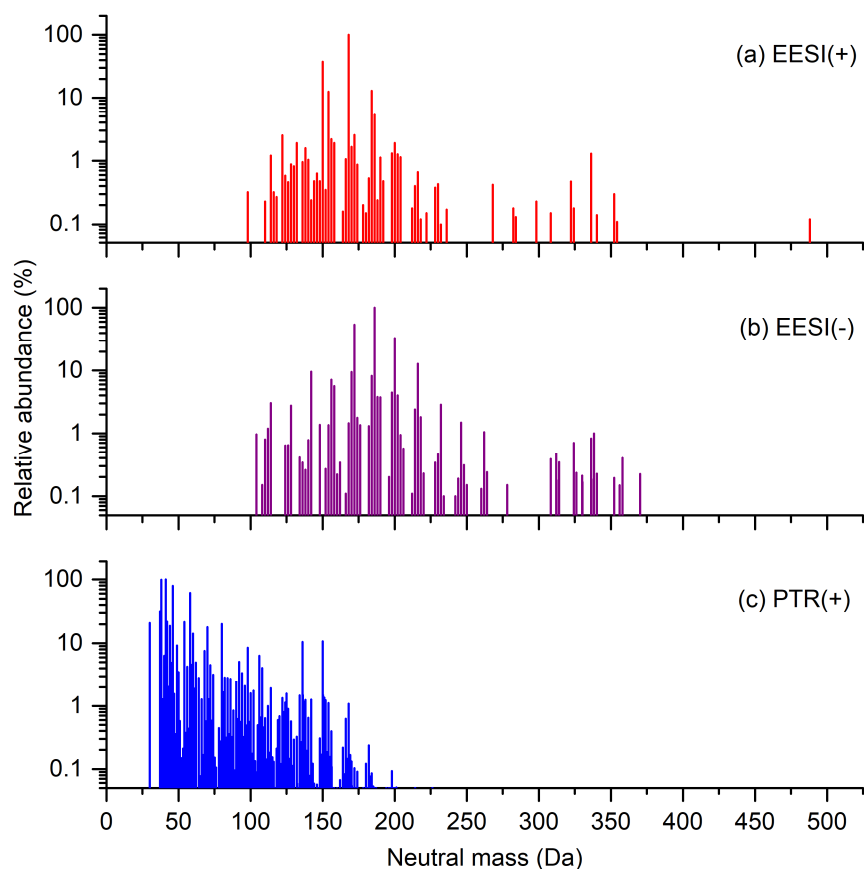

5 **Figure S4: Mass spectra obtained during the dark ozonolysis of  $\alpha$ -pinene under “medium” conditions (Table 1) using three online MS techniques: (a) EESI-MS in positive ionisation mode, (b) EESI-MS in negative ionisation mode and (c) PTR-MS using  $\text{H}_3\text{O}^+$  as a chemical ionisation reagent. The ions have been assigned to molecular formulae and are plotted as neutral masses to aid comparison. Only PTR-MS ions corresponding to assigned  $\alpha$ -pinene ozonolysis products are shown. Taken together, the three techniques enable online detection of a wide variety of organic compound classes and volatilities, from hydrocarbons such as  $\alpha$ -pinene to highly oxidised carboxylic acids.**

10

**Comparison between measured MS peak abundances and MCM concentrations for oxidation products**

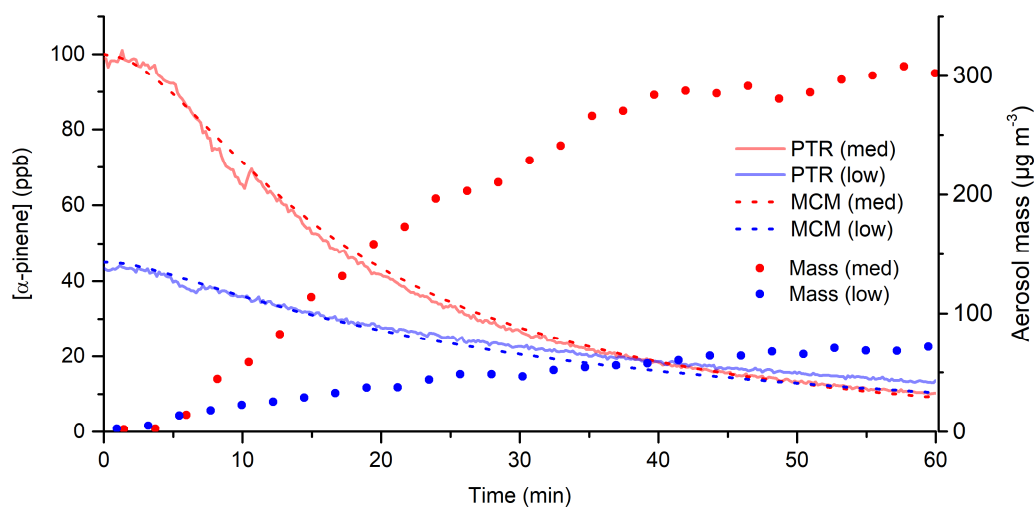

5 **Figure S5:**  $\alpha$ -pinene loss and SOA production during chamber experiments with varying  $[\alpha\text{-pinene}]_0$ , showing only the medium and low concentration conditions. Dashed lines: measured  $[\alpha\text{-pinene}]$  from PTR-MS; Solid lines: MCM simulated  $[\alpha\text{-pinene}]$ ; Points: measured aerosol mass from SMPS.

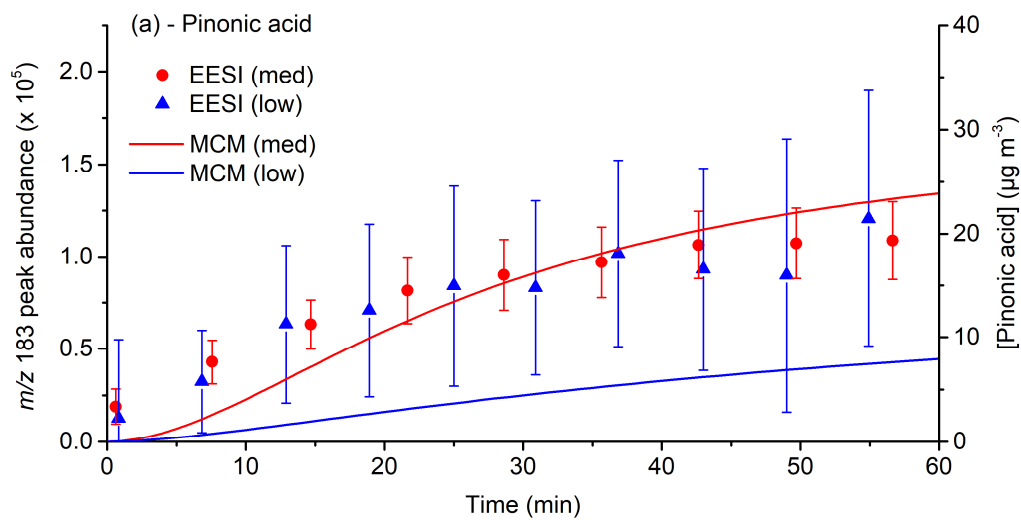

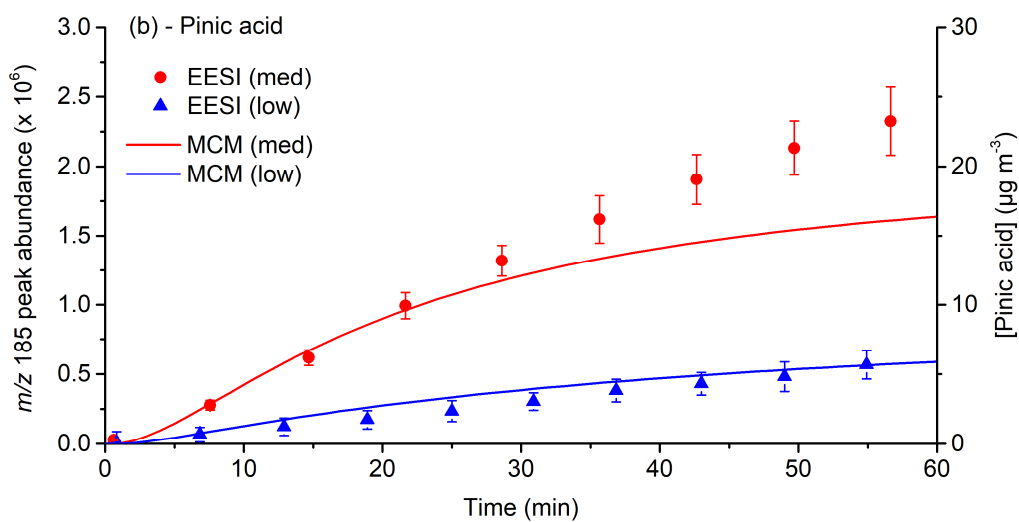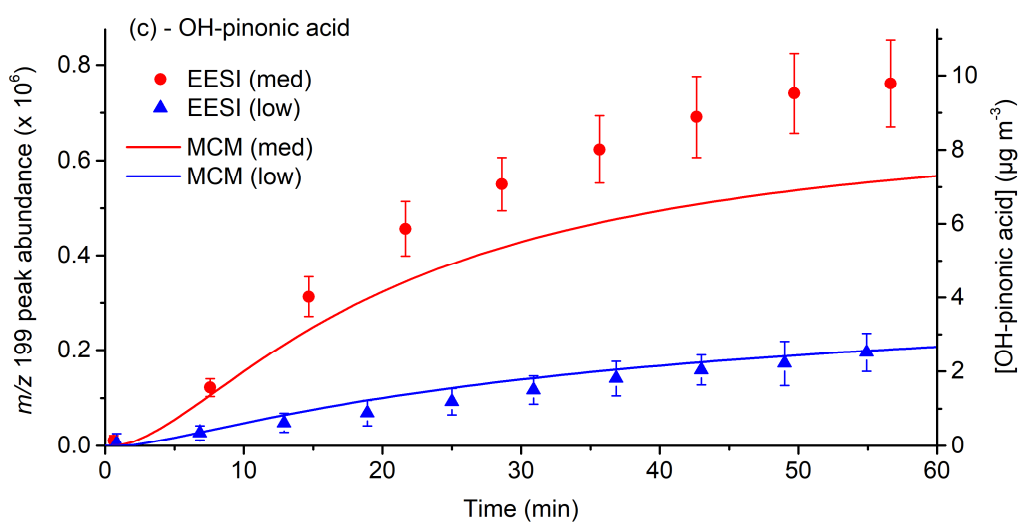

5 **Figure S6: Comparison between EESI-MS peak abundances (left y-axis) and MCM simulated concentrations (right y-axis) for (a) pinonic acid, (b) pinic acid and (c) OH-pinonic acid, showing only the medium and low concentration conditions. The scales of the y-axes from Figure 8 have been divided by 4, so that the relative scaling between the  $m/z$  and MCM axes is consistent with Figure 8.**



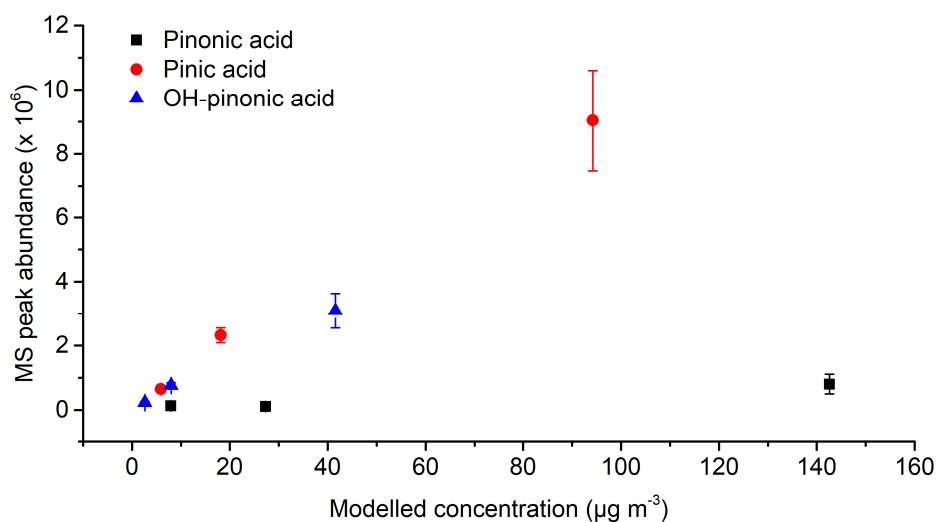

5 **Figure S7: MS peak abundance of pinonic, pinic and OH-pinonic acids as a function of predicted MCM concentrations. The data shown are for the measurements approximately 1 hour after the start of ozonolysis in Figure 8, where the rate of change of concentration slows and hence simulated and measured concentrations represent approximate final yields.**

### References

- 10 Saunders, S. M., Jenkin, M. E., Derwent, R. G. and Pilling, M. J.: Protocol for the development of the Master Chemical Mechanism, MCM v3 (Part A): tropospheric degradation of non-aromatic volatile organic compounds, *Atmos. Chem. Phys.*, 3, 161–180, 2003.
